# Supplementary material for: In Vitro Microrhizome Production, Genetic Homogeneity Assessment, and Field Performance Evaluation in Ginger
Source: MDPI journal article supplement (doi:10.3390/agronomy14040747), 2024-04-04
Supplement: s1 [file s1]

**Table S1.** Code and sequence of 10 pairs of SSR primers used in this study.

| Code     | Repeat motif | No. of repeats | Forward primer             | Reverse primer            | Product size (bp) | Annealing temperature (°C) |
|----------|--------------|----------------|----------------------------|---------------------------|-------------------|----------------------------|
| Ginger02 | TA           | 17             | CTTCCTTATGTGCGTTTGTGC      | TATCTGGAATGTTGATGAAGTTACC | 405               | 53.3                       |
| Ginger07 | GA           | 16             | ATTGGTTGCGGAATAAAGGTGT     | AGCAAAATGGATTAAACATTTGGTC | 236               | 53.1                       |
| Ginger11 | AG           | 18             | AAATGGAGAAGGGGAATAAT       | GCTGAATCATCAATCTTTGTAGTTT | 275               | 50.5                       |
| Ginger25 | GAAAAA       | 5              | ACTCCAGCAGAACCACAACG       | TGGAGGTATCCTCGGTGTCC      | 455               | 58.5                       |
| Ginger49 | AT           | 18             | CCTCTGTTCAAGTTGTTGCCTTGC   | ACCGCACGGGCTGTGGATA       | 328               | 61.0                       |
| Ginger58 | TA           | 20             | GTCTGTACCATCGGGTTTTGTTA    | TTATACCTTGAGATAGGGATGCC   | 361               | 53.9                       |
| Ginger77 | AG           | 23             | GATTTACTTTCAACCAGTCAACCCTT | CACTTGCATCACTCTGATCAACA   | 322               | 55.0                       |
| Ginger84 | GGCGGT       | 5              | ACTGCAGCGATTGCGTTTC        | GAAGAACTGGAGCGAACGAAG     | 360               | 56.5                       |
| Ginger92 | TA           | 30             | CGACTATTGTGCTTGGGTTGA      | ACCATCGCCGTCGTACTAAA      | 343               | 55.6                       |
| Ginger97 | GA           | 17             | TTTATCCGGTTGGCTCAGC        | GTATGTCTCTTTCAGCATTCTCAC  | 238               | 55.4                       |

**Table S2.** Variance analysis of the number and fresh weight of the microrhizomes induced from the *in vitro*-grown ‘Fengtou’ ginger in the orthogonal design experiment of L<sub>9</sub> (3<sup>3</sup>).

| Parameters                               | Source of variance | Degree of freedom | Type III sum of squares | Mean square | F value | Sig.     |
|------------------------------------------|--------------------|-------------------|-------------------------|-------------|---------|----------|
| No. of induced microrhizomes per explant | BAP                | 2                 | 203.984                 | 101.992     | 110.158 | 0.000*** |
|                                          | Sucrose            | 2                 | 125.968                 | 62.984      | 68.027  | 0.000*** |
|                                          | Photoperiod        | 2                 | 22.220                  | 11.110      | 12.000  | 0.000*** |
|                                          | Error              | 20                | 18.517                  | 0.926       |         |          |
|                                          | Total              | 27                | 930.568                 |             |         |          |
| Microrhizome fresh weight (mg)           | BAP                | 2                 | 51251.83                | 25625.92    | 51.34   | 0.000*** |
|                                          | Sucrose            | 2                 | 3847.2053               | 1923.60     | 3.85    | 0.038*   |
|                                          | Photoperiod        | 2                 | 5028.715                | 2514.36     | 5.04    | 0.017*   |
|                                          | Error              | 20                | 9983.55                 | 499.18      |         |          |
|                                          | Total              | 27                | 424143.00               |             |         |          |

\* and \*\*\* indicate significant differences at  $p < 0.05$  and  $0.001$ , respectively.

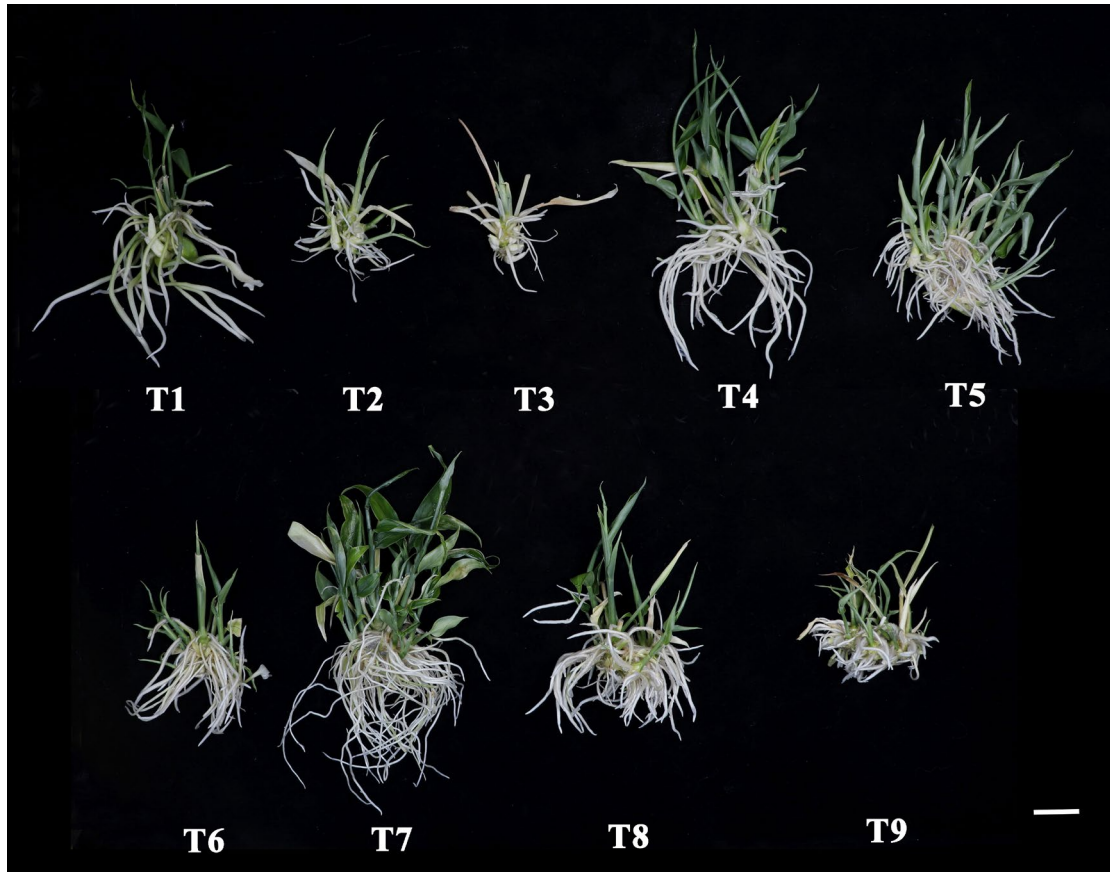

**Figure S1.** Representative shoots, roots, and microrhizomes produced from the plants of *Zingiber officinale* cv. 'Fengtou' after 60 days of culture on the MS basal medium supplemented with different concentrations of BAP (1.0, 2.0, and 3.0 mg l<sup>-1</sup>) and sucrose (60, 80, and 100 g l<sup>-1</sup>) under different photoperiods (12, 16, and 20 h d<sup>-1</sup>). T1–T9 represented the nine treatments designed by a L<sub>9</sub>(3<sup>3</sup>) orthogonal array. Bars = 1.0 cm.

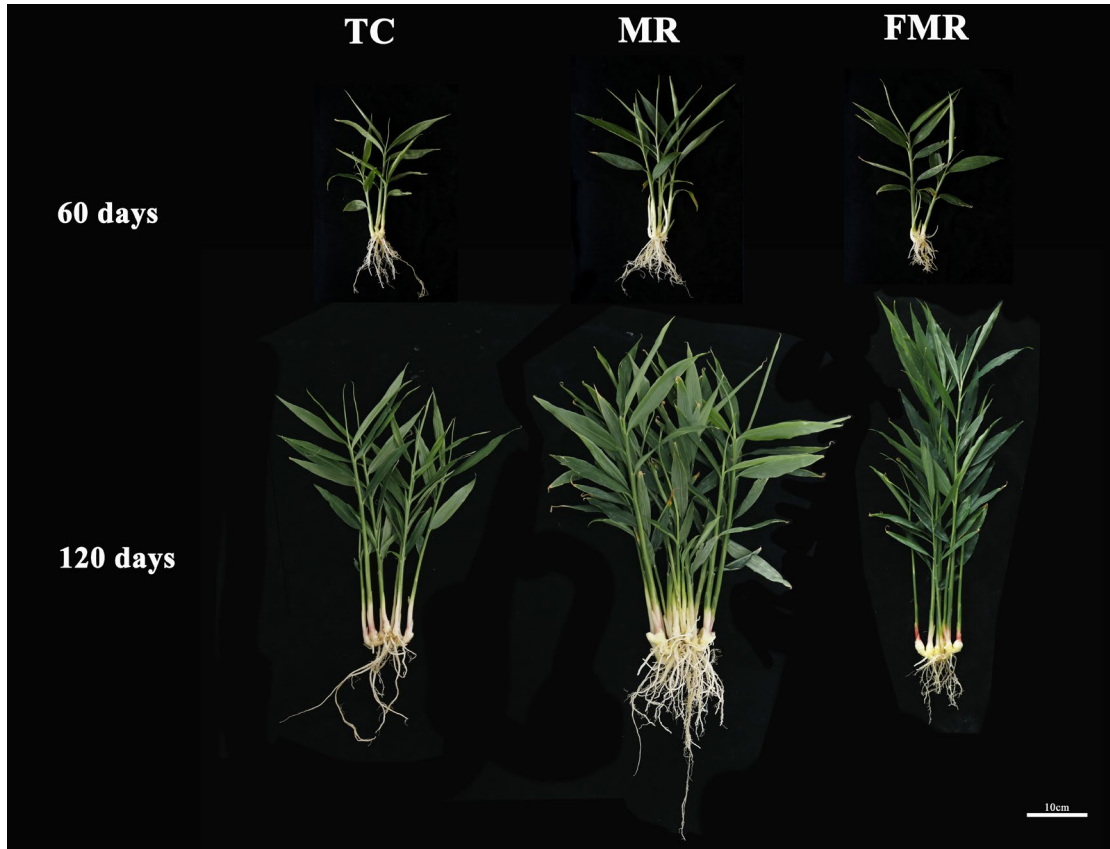

**Figure S2.** The field performance of the TC, MR, and FMR plants after 60 and 120 days of planting in the field.
